# Supplementary material
Source: PubMed Central journal article supplement (PMC6461155)
Supplement: Supp_Table1.pdf [file Supp_Table1.pdf]

**Supplementary Table 1**

| Months post-transplant | %Oxidase+ PMN                      |    |      |      |      |      |                                    |     |      |    |      |    |      | WT |
|------------------------|------------------------------------|----|------|------|------|------|------------------------------------|-----|------|----|------|----|------|----|
|                        | 1 x10 <sup>6</sup> cells/recipient |    |      |      |      |      | 2 x10 <sup>6</sup> cells/recipient |     |      |    |      |    |      |    |
|                        | 1                                  | 2  | 3    | 4    | 5    | 6    | 7                                  | 8   | 9    | 10 | 11   | 12 |      |    |
| <b>1.5 m</b>           |                                    |    |      |      |      |      |                                    |     |      |    |      |    |      |    |
| %DHR+                  | 30                                 | 25 | 34   | 34   | 25   | 30.5 | 28                                 | 32  | 33.5 | 36 | 34   | 36 | 92   |    |
| MFI                    | 57                                 | 59 | 67   | 40   | 48   | 69   | 61                                 | 66  | 52   | 65 | 64   | 51 | 737  |    |
| % Chimer               | 63                                 | 61 | 63   | 61   | 58   | 59   | 64                                 | 60  | 60   | 55 | 65   | 58 | --   |    |
| <b>3 m</b>             |                                    |    |      |      |      |      |                                    |     |      |    |      |    |      |    |
| %DHR+                  | 31                                 | 26 | 29   | 41   | 25   | 31   | 29                                 | 46  | 36   | 27 | 34.5 | 35 | 94   |    |
| MFI                    | 112                                | 71 | 92   | 93   | 90   | 92   | 216                                | 224 | 92   | 99 | 71   | 70 | 1565 |    |
| % Chimer               | 76                                 | 75 | 77   | 76   | 78   | 76   | 80                                 | 78  | 79   | 76 | 78   | 81 | --   |    |
| <b>5 m</b>             |                                    |    |      |      |      |      |                                    |     |      |    |      |    |      |    |
| %DHR+                  | 34                                 | 27 | 26   | 33   | 35   | 25   | 17                                 | 41  | 28   | 28 | 34   | 29 | 93   |    |
| MFI                    | 59                                 | 43 | 32   | 36   | 33   | 49   | 39                                 | 40  | 44   | 50 | 40   | 44 | 1174 |    |
| % Chimer               | 86                                 | 83 | 84   | 84   | 82   | 83   | 88                                 | 82  | 88   | 86 | 86   | 87 | --   |    |
| <b>7 m</b>             |                                    |    |      |      |      |      |                                    |     |      |    |      |    |      |    |
| %DHR+                  | 19                                 | 38 | 13   | 36   | 36   | *    | 12                                 | 43  | 34   | 45 | 48   | 34 | 91   |    |
| MFI                    | 30                                 | 50 | 35   | 32   | 32   |      | 45                                 | 68  | 59   | 50 | 51   | 45 | 480  |    |
| % Chimer               | 90                                 | 87 | 90   | 86   | 88   | 88   | 92                                 | 84  | 91   | 89 | 91   | 90 | --   |    |
| VCN/BM Donor cells     | 0.12                               |    | 0.17 | 0.22 | 0.20 |      |                                    |     |      |    |      |    |      |    |

**Supplementary Table 1.** Reconstitution of superoxide activity, chimerism levels and vector copy numbers in SINfes.gp91s transplanted mice used for the ear inflammation assay.
