# Supplementary material
Source: PubMed Central journal article supplement (PMC6461155)
Supplement: Supp_Table2.pdf [file Supp_Table2.pdf]

## Supplementary Table 2

### SERS11.SF.eGFP.pre

| Plate ID  | copy number | no of clones | F replating | Frequency/copy no  |
|-----------|-------------|--------------|-------------|--------------------|
| ID 230407 | 8.55        | 29           | 0.0035966   | 0.000420655        |
| ID 110607 | 9           | 66           | 0.0116315   | 0.001292389        |
| ID 250607 | 11.5        | 96           | 0.0457471   | 0.003978009        |
| ID 250607 | 23.6        | 34           | 0.0043721   | 0.000185258        |
|           |             |              | <b>Mean</b> | <b>0.001469078</b> |
|           |             |              | <b>SD</b>   | <b>0.001739093</b> |

### SF71gp91phox

| Plate ID  | copy number | no of clones | F replating | Frequency/copy no  |             |
|-----------|-------------|--------------|-------------|--------------------|-------------|
| ID 130907 | nd          | 2            | 0.0002105   |                    |             |
| ID 130907 | nd          | 12           | 0.0013353   |                    |             |
| ID 130907 | nd          | 5            | 0.0005349   |                    |             |
| wt cells  | ID 010709   | 1.08         | 18          | 0.0020764          | 0.001922593 |
| wt cells  | ID 010709   | 1.08         | 4           | 0.0004256          | 0.000394074 |
| wt cells  | ID 010709   | 1.04         | 3           | 0.0003175          | 0.000305288 |
|           | ID 200809   | 0.45         | 2           | 0.0002105          | 0.000467778 |
|           | ID 200809   | 0.52         | 2           | 0.0002105          | 0.000404808 |
|           |             |              | <b>Mean</b> | <b>0.000698908</b> |             |
|           |             |              | <b>SD</b>   | <b>0.00068651</b>  |             |

### SERS11.fes.gp91s.W

| Plate ID  | copy number | no of clones | F replating | Frequency/copy no  |             |
|-----------|-------------|--------------|-------------|--------------------|-------------|
| ID 230407 | 9.36        | 0            | 0           | 0                  |             |
| ID 110607 | 7.6         | 0            | 0           | 0                  |             |
| ID 250607 | 16.1        | 0            | 0           | 0                  |             |
| ID 250607 | 19.7        | 0            | 0           | 0                  |             |
| ID 130907 | 0.45        | 0            | 0           | 0                  |             |
| ID 130907 | 1           | 0            | 0           | 0                  |             |
| ID 130907 | 1.8         | 0            | 0           | 0                  |             |
| wt cells  | ID 010709   | 2.4          | 0           | 0                  |             |
| wt cells  | ID 010709   | 2.6          | 0           | 0                  |             |
| wt cells  | ID 010709   | 2.5          | 0           | 0                  |             |
|           | ID 200809   | 3.2          | 1           | 0.0001047          | 3.27188E-05 |
|           | ID 200809   | 3.5          | 1           | 0.0001047          | 2.99E-05    |
|           | ID 200809   | 32.7         | 0           | 0                  | 0           |
|           |             |              | <b>Mean</b> | <b>3.13165E-05</b> |             |
|           |             |              | <b>SD</b>   | <b>1.98306E-06</b> |             |

### SERS11.fes.gp91s-P415H.W

| Plate ID  | copy number | no of clones | F replating | Frequency/copy no |
|-----------|-------------|--------------|-------------|-------------------|
| ID 230407 | 9.36        | 0            | 0           | 0                 |
| ID 250607 | 12.5        | 0            | 0           | 0                 |
| ID 250607 | 26.6        | 0            | 0           | 0                 |

### SERS11.SF.gp91s.W

| Plate ID  | copy number | no of clones | F replating | Frequency/copy no |
|-----------|-------------|--------------|-------------|-------------------|
| ID 110607 | 4.5         | 9            | 0.0009844   | 0.000218756       |
| ID 250607 | 4.1         | 0            | 0           | 0                 |
| ID 250607 | 12          | 0            | 0           | 0                 |

### SERS11.SF.gp91s-P415H.W

| Plate ID  | copy number | no of clones | F replating | Frequency/copy no |
|-----------|-------------|--------------|-------------|-------------------|
| ID 110607 | 4.14        | 0            | 0           | 0                 |
| ID 250607 | 6.2         | 0            | 0           | 0                 |
| ID 250607 | 8.1         | 6            | 0.0006454   | 7.9679E-05        |
